# Supplementary material for: Discovery of novel tubulin polymerization inhibitors by utilizing 3D-QSAR, molecular docking and molecular dynamics simulation
Source: Royal Society of Chemistry journal article supplement (doi:10.1039/d2nj02773a), 2022-01-01
Supplement: d2nj02773a1.pdf [file d2nj02773a1.pdf]

## Supplementary Material

Table S1. The structure and activity value

| No. | R1 | R2 | Exp. pIC50 | No. | R1 | R2 | Exp. pIC50 |
|-----|----|----|------------|-----|----|----|------------|
| 01  |    |    | 5.123      | 25  |    |    | 5.642      |
| 02* |    |    | 5.254      | 26  |    |    | 4.885      |
| 03  |    |    | 5.662      | 27  |    |    | 5.395      |
| 04* |    |    | 5.480      | 28* |    |    | 5.149      |
| 05  |    |    | 4.179      | 29* |    |    | 5.403      |
| 06  |    |    | 4.992      | 30  |    |    | 5.541      |
| 07* |    |    | 4.971      | 31  |    |    | 5.827      |
| 08  |    |    | 5.038      | 32  |    |    | 5.710      |
| 09* |    |    | 5.339      | 33  |    |    | 4.845      |
| 10  |    |    | 5.514      | 34  |    |    | 4.595      |
| 11  |    |    | 5.879      | 35* |    |    | 5.385      |
| 12  |    |    | 5.635      | 36* |    |    | 5.493      |
| 13  |    |    | 4.527      | 37  |    |    | 5.896      |
| 14* |    |    | 4.962      | 38  |    |    | 5.967      |
| 15* |    |    | 5.141      | 39* |    |    | 5.932      |
| 16  |    |    | 4.992      | 40  |    |    | 4.931      |
| 17  |    |    | 5.358      | 41  |    |    | 5.499      |
| 18* |    |    | 5.461      | 42  |    |    | 5.842      |
| 19* |    |    | 5.658      | 43  |    |    | 6.420      |
| 20  |    |    | 5.463      | 44* |    |    | 5.130      |

|     |  |  |       |     |  |  |       |
|-----|--|--|-------|-----|--|--|-------|
| 21* |  |  | 5.057 | 45* |  |  | 5.039 |
| 22* |  |  | 5.519 | 46  |  |  | 5.016 |
| 23  |  |  | 5.770 | 47  |  |  | 5.424 |
| 24  |  |  | 6.301 | 48* |  |  | 4.734 |

“\*” means test set

Table S2. 31 possible combinations of CoMSIA molecular fields

| COMSIA    | LOO            |    | Non-Cross-Validation |       |         | Field contribution |       |       |       |       |
|-----------|----------------|----|----------------------|-------|---------|--------------------|-------|-------|-------|-------|
|           | q <sup>2</sup> | N  | r <sup>2</sup>       | SEE   | F       | S                  | E     | H     | A     | D     |
| S         | 0.788          | 8  | 0.918                | 0.176 | 29.455  | 1.000              |       |       |       |       |
| E         | 0.826          | 5  | 0.941                | 0.139 | 76.793  |                    | 1.000 |       |       |       |
| H         | 0.778          | 1  | 0.828                | 0.221 | 134.955 |                    |       | 1.000 |       |       |
| A         | 0.424          | 4  | 0.568                | 0.370 | 9.209   |                    |       |       | 1.000 |       |
| D         | 0.081          | 2  | 0.186                | 0.489 | 3.077   |                    |       |       |       | 1.000 |
| S+E       | 0.837          | 4  | 0.943                | 0.135 | 103.317 | 0.220              | 0.780 |       |       |       |
| S+H       | 0.778          | 2  | 0.868                | 0.197 | 89.159  | 0.302              |       | 0.698 |       |       |
| S+A       | 0.834          | 7  | 0.946                | 0.140 | 54.729  | 0.603              |       |       | 0.397 |       |
| S+D       | 0.76           | 10 | 0.929                | 0.172 | 24.796  | 0.893              |       |       |       | 0.107 |
| E+H       | 0.839          | 3  | 0.936                | 0.140 | 125.760 |                    | 0.609 | 0.391 |       |       |
| E+A       | 0.822          | 5  | 0.936                | 0.145 | 70.264  |                    | 0.685 |       | 0.315 |       |
| E+D       | 0.813          | 6  | 0.930                | 0.155 | 50.925  |                    | 0.839 |       |       | 0.161 |
| H+A       | 0.797          | 4  | 0.902                | 0.177 | 57.380  |                    |       | 0.669 | 0.331 |       |
| H+D       | 0.753          | 4  | 0.850                | 0.218 | 35.327  |                    |       | 0.926 |       | 0.074 |
| A+D       | 0.552          | 3  | 0.656                | 0.324 | 16.493  |                    |       |       | 0.537 | 0.463 |
| S+E+H     | 0.846          | 3  | 0.938                | 0.138 | 130.986 | 0.143              | 0.527 | 0.330 |       |       |
| S+E+A     | 0.826          | 5  | 0.914                | 0.140 | 75.983  | 0.172              | 0.546 |       | 0.282 |       |
| S+E+D     | 0.819          | 5  | 0.924                | 0.158 | 58.743  | 0.152              | 0.651 |       |       | 0.196 |
| S+H+A     | 0.817          | 5  | 0.930                | 0.152 | 63.923  | 0.240              |       | 0.476 | 0.384 |       |
| S+H+D     | 0.765          | 3  | 0.858                | 0.208 | 52.459  | 0.263              |       | 0.611 |       | 0.127 |
| S+A+D     | 0.823          | 8  | 0.946                | 0.143 | 46.026  | 0.598              |       |       | 0.243 | 0.158 |
| E+H+D     | 0.828          | 3  | 0.910                | 0.166 | 87.229  |                    | 0.551 | 0.285 |       | 0.165 |
| E+H+A     | 0.811          | 3  | 0.916                | 0.160 | 94.887  |                    | 0.441 | 0.228 | 0.271 |       |
| E+A+D     | 0.803          | 5  | 0.922                | 0.160 | 56.970  |                    | 0.573 |       | 0.207 | 0.219 |
| H+A+D     | 0.777          | 6  | 0.906                | 0.180 | 36.787  |                    |       | 0.618 | 0.263 | 0.119 |
| S+E+H+A   | 0.812          | 3  | 0.924                | 0.152 | 105.964 | 0.111              | 0.394 | 0.252 | 0.243 |       |
| S+E+H+D   | 0.83           | 3  | 0.913                | 0.163 | 90.874  | 0.105              | 0.479 | 0.249 |       | 0.167 |
| S+E+A+D   | 0.815          | 5  | 0.930                | 0.152 | 63.833  | 0.122              | 0.476 |       | 0.193 | 0.208 |
| S+H+A+D   | 0.805          | 10 | 0.966                | 0.118 | 54.665  | 0.274              |       | 0.508 | 0.166 | 0.052 |
| E+H+A+D   | 0.803          | 5  | 0.928                | 0.154 | 62.003  |                    | 0.437 | 0.233 | 0.184 | 0.147 |
| S+E+H+A+D | 0.812          | 5  | 0.933                | 0.149 | 66.827  | 0.097              | 0.383 | 0.202 | 0.174 | 0.145 |

Table S3. Errors and Prediction pIC50 in the Training and Test Sets of the 3D-QSAR Model

| NO. | Exp. <i>pIC50</i> | CoMFA        |        | CoMSA        |        |
|-----|-------------------|--------------|--------|--------------|--------|
|     |                   | <i>pIC50</i> | Error  | <i>pIC50</i> | Error  |
| 01  | 5.123             | 5.27         | 0.147  | 5.236        | 0.113  |
| 02  | 5.254             | 5.291        | 0.037  | 5.445        | 0.191  |
| 03  | 5.662             | 5.718        | 0.056  | 5.812        | 0.150  |
| 04  | 5.480             | 5.304        | -0.176 | 5.422        | -0.058 |
| 05  | 4.179             | 4.427        | 0.248  | 4.441        | 0.262  |
| 06  | 4.992             | 4.822        | -0.170 | 4.802        | -0.190 |
| 07  | 4.971             | 5.131        | 0.160  | 5.076        | 0.105  |
| 08  | 5.038             | 4.873        | -0.165 | 4.994        | -0.045 |
| 09  | 5.339             | 5.416        | 0.077  | 5.249        | -0.090 |
| 10  | 5.514             | 5.438        | -0.076 | 5.458        | -0.056 |
| 11  | 5.879             | 5.868        | -0.011 | 5.825        | -0.054 |
| 12  | 5.635             | 5.450        | -0.185 | 5.436        | -0.199 |
| 13  | 4.527             | 4.576        | 0.049  | 4.454        | -0.073 |
| 14  | 4.962             | 4.677        | -0.285 | 4.748        | -0.214 |
| 15  | 5.141             | 4.882        | -0.259 | 4.915        | -0.226 |
| 16  | 4.922             | 4.874        | -0.048 | 4.972        | 0.050  |
| 17  | 5.358             | 5.413        | 0.055  | 5.304        | -0.054 |
| 18  | 5.461             | 5.435        | -0.026 | 5.512        | 0.051  |
| 19  | 5.658             | 5.863        | 0.205  | 5.882        | 0.224  |
| 20  | 5.463             | 5.449        | -0.014 | 5.491        | 0.028  |
| 21  | 5.057             | 4.873        | -0.184 | 5.033        | -0.024 |
| 22  | 5.519             | 5.804        | 0.285  | 5.636        | 0.117  |
| 23  | 5.770             | 5.826        | 0.056  | 5.845        | 0.075  |
| 24  | 6.301             | 6.257        | -0.044 | 6.214        | -0.087 |
| 25  | 5.642             | 5.841        | 0.199  | 5.822        | 0.180  |
| 26  | 4.885             | 4.959        | 0.074  | 4.841        | -0.044 |
| 27  | 5.395             | 5.269        | -0.126 | 5.302        | -0.093 |
| 28  | 5.149             | 5.012        | -0.137 | 5.278        | 0.129  |
| 29  | 5.403             | 5.629        | 0.226  | 5.458        | 0.055  |
| 30  | 5.541             | 5.654        | 0.113  | 5.668        | 0.127  |
| 31  | 5.827             | 6.078        | 0.251  | 6.037        | 0.210  |
| 32  | 5.710             | 5.665        | -0.045 | 5.646        | -0.064 |
| 33  | 4.845             | 4.785        | -0.060 | 4.665        | -0.180 |
| 34  | 4.595             | 4.644        | 0.049  | 4.664        | 0.069  |
| 35  | 5.385             | 5.094        | -0.291 | 5.124        | -0.261 |
| 36  | 5.493             | 5.418        | -0.075 | 5.394        | -0.099 |
| 37  | 5.896             | 5.753        | -0.143 | 5.664        | -0.232 |
| 38  | 5.967             | 5.866        | -0.101 | 5.972        | 0.005  |
| 39  | 5.932             | 5.454        | -0.478 | 5.581        | -0.351 |
| 40  | 4.931             | 4.881        | -0.050 | 5.060        | 0.129  |
| 41  | 5.499             | 5.719        | 0.2197 | 5.627        | 0.128  |
| 42  | 5.842             | 5.746        | -0.096 | 5.835        | -0.007 |
| 43  | 6.420             | 6.170        | -0.250 | 6.205        | -0.215 |
| 44  | 5.130             | 5.760        | 0.630  | 5.814        | 0.684  |
| 45  | 5.039             | 4.877        | -0.162 | 4.832        | -0.207 |
| 46  | 5.016             | 4.925        | -0.091 | 5.036        | 0.020  |
| 47  | 5.424             | 5.584        | 0.160  | 5.467        | 0.619  |
| 48  | 4.734             | 5.099        | 0.365  | 5.353        | 0.043  |
